# Supplementary material
Source: publisher figshare collection journal article supplement (https://frontiersin.figshare.com/ndownloader/files/34984447)
Supplement: Supplementary file [file 34984447]

## Appendix 1: Creative Movement Praxis Definition of Terms

|                  |                                                                                                                                                             |
|------------------|-------------------------------------------------------------------------------------------------------------------------------------------------------------|
| Visual Biography | A methodological component of phenomenology capturing manifestations of unit of experiences through movement and photography.                               |
| Creativity       | Continuum-temporal-rhythm embodied by self.                                                                                                                 |
| Assemblage       | A multiplicity of 'events,' collection of 'things' or 'actors' held together (relation).                                                                    |
| Motion/Motility  | Intensive points of an infinite number of points at varying singularities.                                                                                  |
| Space Connectors | A plurality of forces acting and affected by incubated knowledge within the context of a lived-living body.                                                 |
| Place Making     | Virtual multiplicities or intensities that consistently document accessed spaces that are localized by personhood.                                          |
| Place Attachment | A process of differentiation within the context of self-determination.<br>A durable and robust passage of connection both virtual to actual within a thing. |

Glossary (Baugh, 1997; Dhillon, 2018; Dhillon & Ulmer, 2021)
